# Supplementary material
Source: PubMed Central journal article supplement (PMC3781593)
Supplement: NIHMS509234-supplement-1_si_001.pdf [file NIHMS509234-supplement-1_si_001.pdf]

## SUPPORTING INFORMATION

### Discovery of Hydroxylated Polychlorinated Biphenyls (OH-PCBs) in sediment from a Lake Michigan waterway and original commercial Aroclors

Rachel F. Marek<sup>1</sup>, Andres Martinez<sup>1</sup>, and Keri C. Hornbuckle<sup>1\*</sup>

1. Department of Civil and Environmental Engineering  
IIHR-Hydroscience and Engineering  
The University of Iowa  
Iowa City, IA 52242 USA

\*Corresponding author information: Keri Hornbuckle: 4105 SC, Iowa City, IA 52242;  
kerihornbuckle@uiowa.edu; Phone: (319) 384-0789 FAX: (319) 335-5660

Number of pages: 11

Number of figures: 3

Number of tables: 5

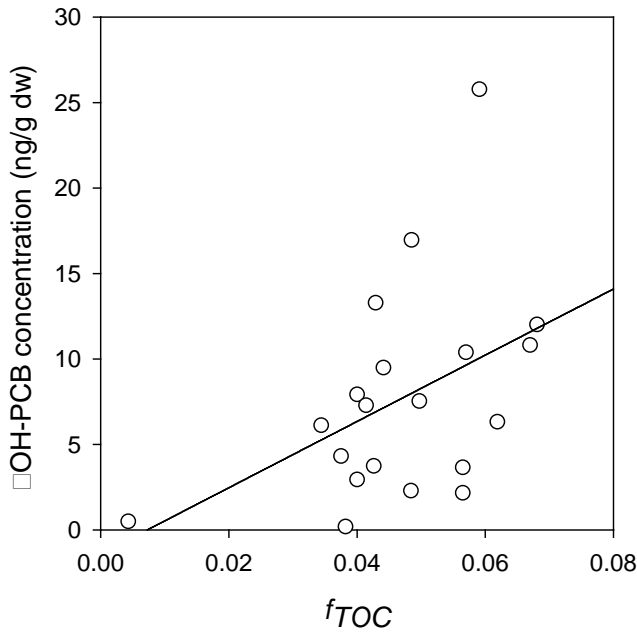

**Figure S1.**  $\Sigma OH-PCB$  increases with increasing TOC ( $R^2 = 0.20$ ,  $p = 0.048$ ). Each circle represents a sample.

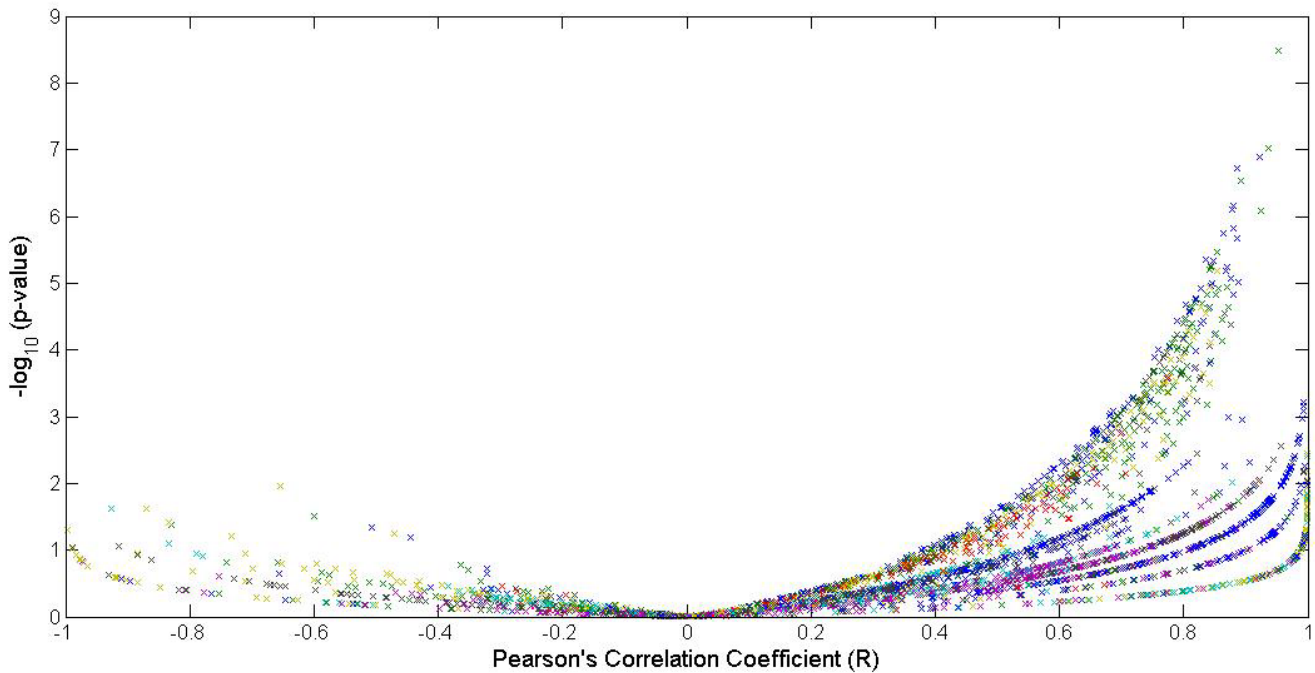

**Figure S2.** The Pearson's Correlation Coefficient and p-value for each OH-PCB:PCB pair. Each point on the graph represents one pair. Pairs were included only if both the OH-PCB and PCB were measured in at least 3 samples (2764 pairs). 713 pairs (26%) had significant relationships ( $p < 0.05$ ). A positive  $R$ -value signifies a positive relationship (i.e. OH-PCB concentration increases as PCB concentration increases). Conversely, a negative  $R$ -value signifies a negative relationship (i.e. OH-PCB concentration decreases as PCB concentration increases). Of the statistically significant relationships, almost all (705 pairs) were positive.

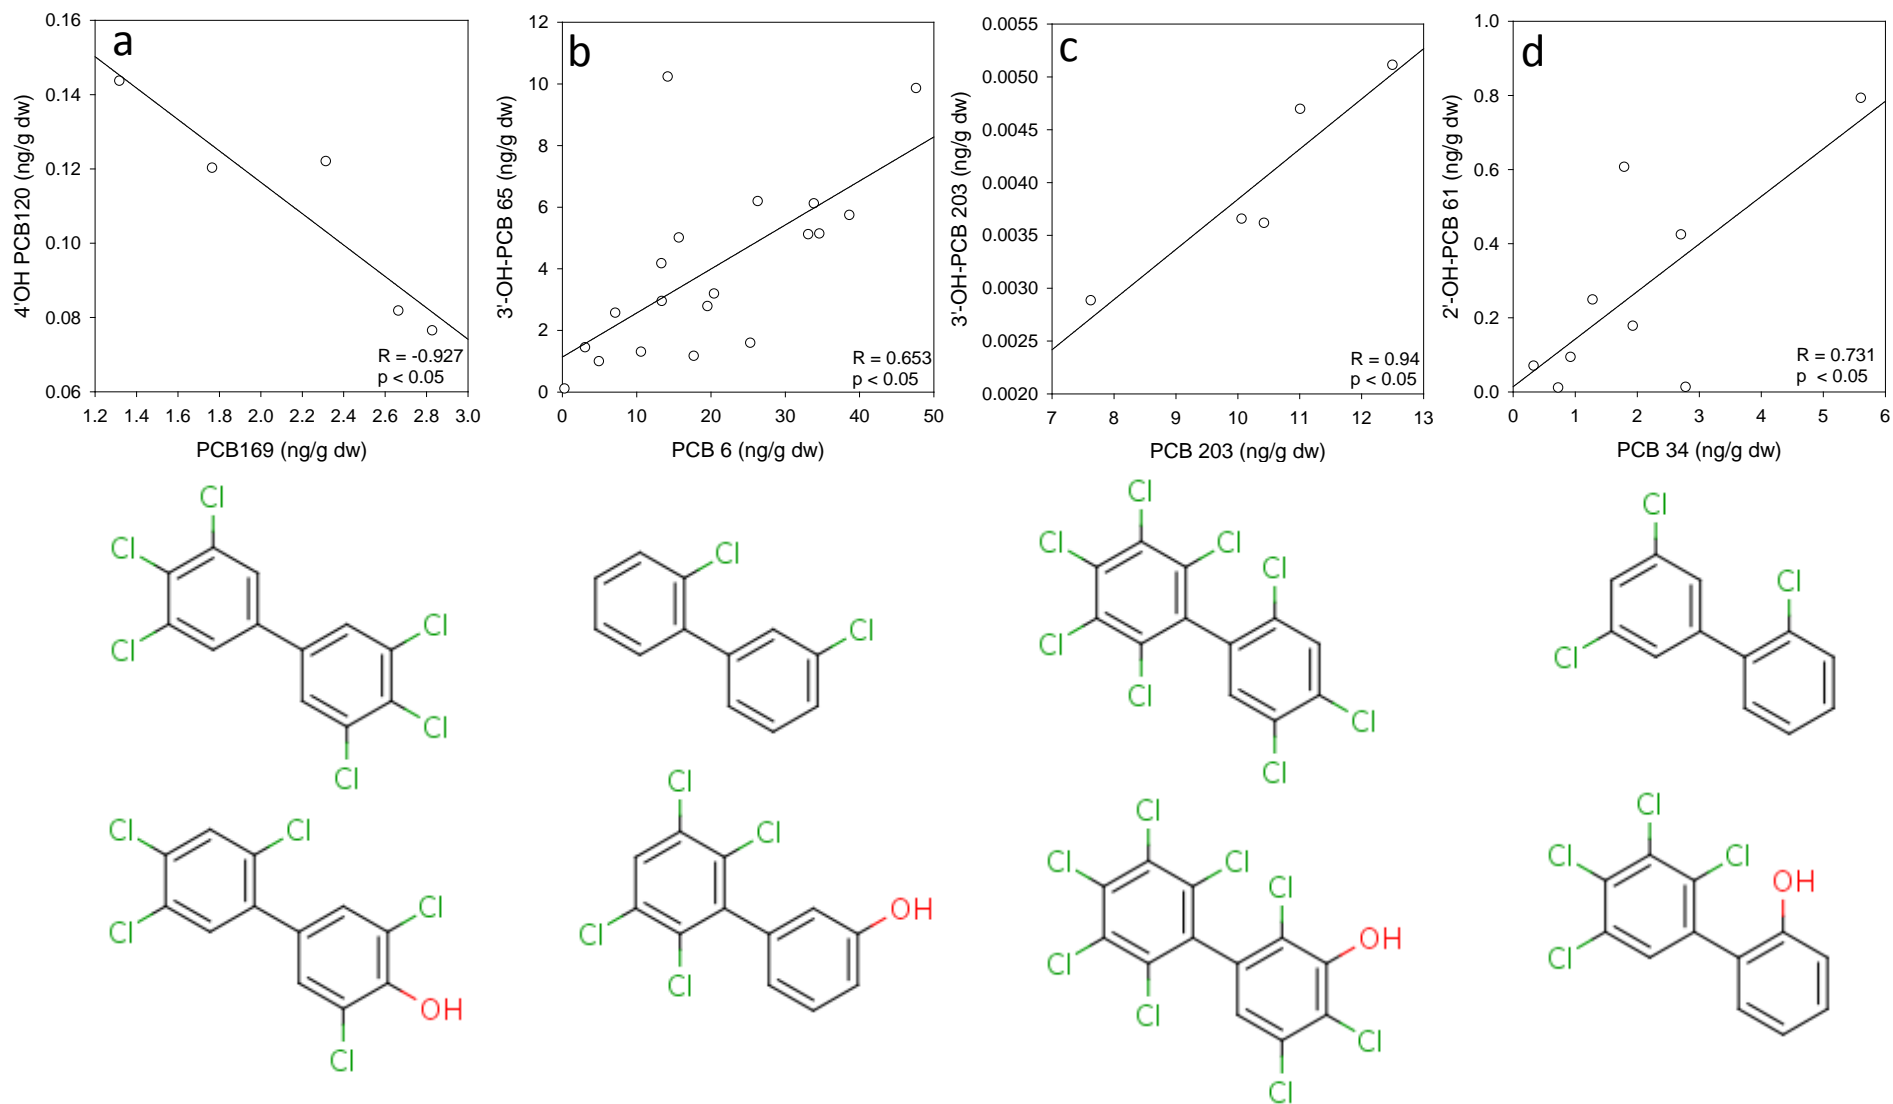

**Figure S3.** Significant correlations between OH-PCB:PCB pairs. Examples (a) and (b) involve OH-PCBs that were measured in both sediment and Aroclor. Assuming degradation refers to the possibility of dechlorination and insertion of an OH group but not chlorination or rearrangement of the chlorine atoms, neither OH-PCB could be formed from degradation of the PCB. Examples (c) and (d) involve OH-PCBs that were measured in sediment but not Aroclor. In example (c) the OH-PCB could be formed by degradation of the PCB but in example (d) the OH-PCB could not be formed by degradation of the PCB.

**Table S1.** Precursor and dominant product ions of the 65 quantitative calibration standards. The standards were purchased from either AccuStandard, Inc. (AccuStd) or Wellington Laboratories (Well).

| Source   | Congener                                     | Abbreviation   | Homolog | Precursor | Product |
|----------|----------------------------------------------|----------------|---------|-----------|---------|
| AccuStd  | 4-methoxy-2-chlorobiphenyl                   | 4-MeO-PCB 1    | mono    | 218.6     | 174.9   |
| AccuStd  | 4-methoxy-3-chlorobiphenyl                   | 4-MeO-PCB 2    | mono    | 218.6     | 174.9   |
| AccuStd  | 6-methoxy-3-chlorobiphenyl                   | 6-MeO-PCB 2    | mono    | 218.6     | 168     |
| AccuStd  | 4'-methoxy-4-chlorobiphenyl                  | 4'-MeO-PCB 3   | mono    | 218.6     | 174.9   |
| AccuStd  | 2'-methoxy-2,3-dichlorobiphenyl              | 2'-MeO-PCB 5   | di      | 253.1     | 201.9   |
| AccuStd  | 3'-methoxy-2,5-dichlorobiphenyl              | 3'-MeO-PCB 9   | di      | 253.1     | 152     |
| AccuStd  | 4'-methoxy-2,5-dichlorobiphenyl              | 4'-MeO-PCB 9   | di      | 253.1     | 210.9   |
| AccuStd  | 2'-methoxy-3,4-dichlorobiphenyl              | 2'-MeO-PCB 12  | di      | 253.1     | 201.9   |
| AccuStd  | 4-methoxy-3,5-dichlorobiphenyl               | 4-MeO-PCB 14   | di      | 253.1     | 210.9   |
| AccuStd  | 4'-methoxy-2,2',5-trichlorobiphenyl          | 4'-MeO-PCB 18  | tri     | 287.5     | 245     |
| AccuStd  | 4'-methoxy-2,3',5-trichlorobiphenyl          | 4'-MeO-PCB 26  | tri     | 287.5     | 245     |
| AccuStd  | 6'-methoxy-2,3',5-trichlorobiphenyl          | 6'-MeO-PCB 26  | tri     | 287.5     | 238     |
| AccuStd  | 2'-methoxy-2,4,6-trichlorobiphenyl           | 2'-MeO-PCB 30  | tri     | 287.5     | 238     |
| AccuStd  | 3'-methoxy-2,4,6-trichlorobiphenyl           | 3'-MeO-PCB 30  | tri     | 287.5     | 245     |
| AccuStd  | 4'-methoxy-2,4,6-trichlorobiphenyl           | 4'-MeO-PCB 30  | tri     | 287.5     | 245     |
| AccuStd  | 3-methoxy-2,2',6,6'-tetrachlorobiphenyl      | 3-MeO-PCB 54   | tetra   | 322.0     | 278.8   |
| AccuStd  | 2'-methoxy-2,3,4,5-tetrachlorobiphenyl       | 2'-MeO-PCB 61  | tetra   | 322.0     | 272     |
| AccuStd  | 3'-methoxy-2,3,4,5-tetrachlorobiphenyl       | 3'-MeO-PCB 61  | tetra   | 322.0     | 221.8   |
| WellMixA | 4'-methoxy -2,3,4,5-tetrachlorobiphenyl      | 4'-MeO-PCB 61  | tetra   | 322.0     | 278.8   |
| AccuStd  | 2'-methoxy-2,3,5,6-tetrachlorobiphenyl       | 2'-MeO-PCB 65  | tetra   | 322.0     | 272     |
| AccuStd  | 3'-methoxy-2,3,5,6-tetrachlorobiphenyl       | 3'-MeO-PCB 65  | tetra   | 322.0     | 221.8   |
| AccuStd  | 4'-methoxy-2,3',4,6-tetrachlorobiphenyl      | 4'-MeO-PCB 69  | tetra   | 322.0     | 278.8   |
| AccuStd  | 6'-methoxy-2,3',4,6-tetrachlorobiphenyl      | 6'-MeO-PCB 69  | tetra   | 322.0     | 272     |
| AccuStd  | 4'-methoxy-2,3',5,5'-tetrachlorobiphenyl     | 4'-MeO-PCB 72  | tetra   | 322.0     | 278.8   |
| WellMixB | 4'-methoxy-3,3',4,5'-tetrachlorobiphenyl     | 4'-MeO-PCB 79  | tetra   | 322.0     | 278.8   |
| AccuStd  | 6'-methoxy-2,2',3,3',5-pentachlorobiphenyl   | 6'-MeO-PCB 83  | penta   | 356.4     | 305.8   |
| AccuStd  | 4'-methoxy-2,2',3,4,5-pentachlorobiphenyl    | 4'-MeO-PCB 86  | penta   | 356.4     | 312.9   |
| AccuStd  | 4'-methoxy-2,2',3,5,6-pentachlorobiphenyl    | 4'-MeO-PCB 93  | penta   | 356.4     | 312.9   |
| WellMixG | 4'-methoxy-2,2',3',4,5-pentachlorobiphenyl   | 4'-MeO-PCB 97  | penta   | 356.4     | 312.9   |
| WellMixB | 4'-methoxy-2,2',4,5,5'-pentachlorobiphenyl   | 4'-MeO-PCB 101 | penta   | 356.4     | 312.9   |
| AccuStd  | 6'-methoxy-2,2',4,5,5'-pentachlorobiphenyl   | 6'-MeO-PCB 101 | penta   | 356.4     | 305.8   |
| AccuStd  | 6'-methoxy-2,3,3',4,5-pentachlorobiphenyl    | 6'-MeO-PCB 106 | penta   | 356.4     | 305.8   |
| WellMixF | 4-methoxy-2,3,3',4',5-pentachlorobiphenyl    | 4-MeO-PCB 107  | penta   | 356.4     | 312.9   |
| WellMixE | 4'-methoxy-2,3,3',4,5'-pentachlorobiphenyl   | 4'-MeO-PCB 108 | penta   | 356.4     | 312.9   |
| WellMixC | 2-methoxy-2,3,4,4',5-pentachlorobiphenyl     | 2'-MeO-PCB 114 | penta   | 356.4     | 305.8   |
| WellMixD | 3-methoxy-2,3',4,4',5-pentachlorobiphenyl    | 3-MeO-PCB 118  | penta   | 356.4     | 312.9   |
| WellMixA | 4'-methoxy-2,3',4,5,5'-pentachlorobiphenyl   | 4'-MeO-PCB 120 | penta   | 356.4     | 312.9   |
| WellMixH | 4'-methoxy-3,3',4,5,5'-pentachloro-biphenyl  | 4'-MeO-PCB 127 | penta   | 356.4     | 340.7   |
| WellMixE | 4'-methoxy-2,2',3,3',4,5'-hexachlorobiphenyl | 4'-MeO-PCB 130 | hexa    | 390.9     | 346.8   |
| WellMixB | 4-methoxy-2,2',3,3',5,6-hexachlorobiphenyl   | 4-MeO-PCB 134  | hexa    | 390.9     | 346.8   |
| WellMixD | 3'-methoxy-2,2',3,4,4',5'-hexachlorobiphenyl | 3'-MeO-PCB 138 | hexa    | 390.9     | 346.8   |
| AccuStd  | 5-methoxy-2,2',3,4,4',5'-hexachlorobiphenyl  | 5-MeO-PCB 138  | hexa    | 390.9     | 346.8   |

**Table S1 (continued)**

| Source    | Congener                                              | Abbreviation       | Homlog       | Precursor | Product |
|-----------|-------------------------------------------------------|--------------------|--------------|-----------|---------|
| WellMixC  | 4-methoxy-2,2',3,4',5,5'-hexachlorobiphenyl           | 4-MeO-PCB 146      | hexa         | 390.9     | 346.8   |
| WellMixA  | 3,3'-dimethoxy-2,2',4,4',6,6'-hexachlorobiphenyl      | 3,3'-diMeO-PCB 155 | hexa, di MeO | 420.9     | 376.7   |
| WellMixXG | 4'-methoxy-2,3,3',4,5,5'-hexachlorobiphenyl           | 4'-MeO-PCB 159     | hexa         | 390.9     | 346.8   |
| WellMixI  | 4-methoxy-2,3,3',4',5,5'-hexachlorobiphenyl           | 4-MeO-PCB 162      | hexa         | 390.9     | 346.8   |
| WellMixF  | 4-methoxy-2,3,3',4',5,6-hexachlorobiphenyl            | 4-MeO-PCB 163      | hexa         | 390.9     | 346.8   |
| WellMixH  | 4'-methoxy-2,2',3,3',4,5,5'-heptachlorobiphenyl       | 4'-MeO-PCB 172     | hepta        | 425.3     | 382.8   |
| WellMixF  | 4-methoxy-2,2',3,3',4',5,6-hexachlorobiphenyl         | 4-MeO-PCB 177      | hepta        | 425.3     | 382.8   |
| WellMixXB | 4-methoxy-2,2',3,3',5,5',6-hexachlorobiphenyl         | 4-MeO-PCB 178      | hepta        | 425.3     | 382.8   |
| WellMixG  | 3'-methoxy-2,2',3,4,4',5,5'-heptachlorobiphenyl       | 3'-MeO-PCB 180     | hepta        | 425.3     | 382.8   |
| WellMixC  | 3'-methoxy-2,2',3,4,4',5,6'-heptachlorobiphenyl       | 3'-MeO-PCB 182     | hepta        | 425.3     | 382.8   |
| WellMixD  | 3'-methoxy-2,2',3,4,4',5',6-hexachlorobiphenyl        | 3'-MeO-PCB 183     | hepta        | 425.3     | 382.8   |
| AccuStd   | 5-methoxy-2,2',3,4,4',5'6-hexachlorobiphenyl          | 5-MeO-PCB 183      | hepta        | 425.3     | 382.8   |
| WellMixA  | 3'-methoxy 2,2',3,4,4',6,6'-heptachlorobiphenyl       | 3'-MeO-PCB 184     | hepta        | 425.3     | 382.8   |
| WellMixE  | 4-methoxy-2,2',3,4',5,5',6-hexachlorobiphenyl         | 4-MeO-PCB187       | hepta        | 425.3     | 382.8   |
| WellMixI  | 4-methoxy-2,3,3',4',5,5',6-hexachlorobiphenyl         | 4-MeO-PCB193       | hepta        | 425.3     | 382.8   |
| WellMixD  | 4'-methoxy-2,2',3,3',4,5,5',6-octachlorobiphenyl      | 4'-MeO-PCB198      | octa         | 459.8     | 416.8   |
| WellMixE  | 4'-methoxy-2,2',3,3',4,5,5',6'-octachlorobiphenyl     | 4'-MeO-PCB199      | octa         | 459.8     | 416.8   |
| WellMixF  | 4'-methoxy-2,2',3,3',4,5,6,6'-octachlorobiphenyl      | 4'-MeO-PCB200      | octa         | 459.8     | 416.8   |
| WellMixXB | 4'-methoxy-2,2',3,3',4,5',6,6'-octachlorobiphenyl     | 4'-MeO-PCB201      | octa         | 459.8     | 416.8   |
| WellMixA  | 4-methoxy-2,2',3,3',5,5',6,6'-octachlorobiphenyl      | 4-MeO-PCB202       | octa         | 459.8     | 416.8   |
| WellMixXG | 4,4'-dimethoxy-2,2',3,3',5,5',6,6'-octachlorobiphenyl | 4,4'-diMeO-PCB202  | octa, di MeO | 489.8     | 446.7   |
| WellMixC  | 3'-methoxy-2,2',3,4,4',5,5',6-octachlorobiphenyl      | 3'-MeO-PCB203      | octa         | 459.8     | 416.8   |
| WellMixC  | 4'-methoxy 2,2',3,3',4,5,5',6,6'-nonachlorobiphenyl   | 4'-MeO-PCB208      | nona         | 494.2     | 450.7   |

**Table S2.** OH-PCB congeners and their abbreviations.

| Congener                                   | Abbreviation  | Congener                                              | Abbreviation      |
|--------------------------------------------|---------------|-------------------------------------------------------|-------------------|
| 4-hydroxy-2-chlorobiphenyl                 | 4-OH-PCB 1    | 4'-hydroxy-2,3,3',4,5'-pentachlorobiphenyl            | 4'-OH-PCB 108     |
| 4-hydroxy-3-chlorobiphenyl                 | 4-OH-PCB 2    | 2'-hydroxy-2,3,4,4',5-pentachlorobiphenyl             | 2'-OH-PCB 114     |
| 6-hydroxy-3-chlorobiphenyl                 | 6-OH-PCB 2    | 3-hydroxy-2,3',4,4',5-pentachlorobiphenyl             | 3-OH-PCB 118      |
| 4'-hydroxy-4-chlorobiphenyl                | 4'-OH-PCB 3   | 4'-hydroxy-2,3',4,5,5'-pentachlorobiphenyl            | 4'-OH-PCB 120     |
| 2'-hydroxy-2,3-dichlorobiphenyl            | 2'-OH-PCB 5   | 4'-hydroxy-3,3',4,5,5'-pentachlorobiphenyl            | 4'-OH-PCB 127     |
| 3'-hydroxy-2,5-dichlorobiphenyl            | 3'-OH-PCB 9   | 4'-hydroxy-2,2',3,3',4,5'-hexachlorobiphenyl          | 4'-OH-PCB 130     |
| 4'-hydroxy-2,5-dichlorobiphenyl            | 4'-OH-PCB 9   | 4-hydroxy-2,2',3,3',5,6-hexachlorobiphenyl            | 4-OH-PCB 134      |
| 2'-hydroxy-3,4-dichlorobiphenyl            | 2'-OH-PCB 12  | 3'-hydroxy-2,2',3,4,4',5'-hexachlorobiphenyl          | 3'-OH-PCB 138     |
| 4-hydroxy-3,5-dichlorobiphenyl             | 4-OH-PCB 14   | 5-hydroxy-2,2',3,4,4',5'-hexachlorobiphenyl           | 5-OH-PCB 138      |
| 4'-hydroxy-2,2',5-trichlorobiphenyl        | 4'-OH-PCB 18  | 4-hydroxy-2,2',3,4',5,5'-hexachlorobiphenyl           | 4-OH-PCB 146      |
| 4'-hydroxy-2,3',5-trichlorobiphenyl        | 4'-OH-PCB 26  | 3,3'-dihydroxy-2,2',4,4',6,6'-hexachlorobiphenyl      | 3,3'-diOH-PCB 155 |
| 6'-hydroxy-2,3',5-trichlorobiphenyl        | 6'-OH-PCB 26  | 4'-hydroxy-2,3,3',4,5,5'-hexachlorobiphenyl           | 4'-OH-PCB 159     |
| 2'-hydroxy-2,4,6-trichlorobiphenyl         | 2'-OH-PCB 30  | 4-hydroxy-2,3,3',4',5,5'-hexachlorobiphenyl           | 4-OH-PCB 162      |
| 3'-hydroxy-2,4,6-trichlorobiphenyl         | 3'-OH-PCB 30  | 4-hydroxy-2,3,3',4',5,6-hexachlorobiphenyl            | 4-OH-PCB 163      |
| 4'-hydroxy-2,4,6-trichlorobiphenyl         | 4'-OH-PCB 30  | 4'-hydroxy-2,2',3,3',4,5,5'-heptachlorobiphenyl       | 4'-OH-PCB 172     |
| 3-hydroxy-2,2',6,6'-tetrachlorobiphenyl    | 3-OH-PCB 54   | 4-hydroxy-2,2',3,3',4',5,6-heptachlorobiphenyl        | 4-OH-PCB 177      |
| 2'-hydroxy-2,3,4,5-tetrachlorobiphenyl     | 2'-OH-PCB 61  | 4-hydroxy-2,2',3,3',5,5',6-heptachlorobiphenyl        | 4-OH-PCB 178      |
| 3'-hydroxy-2,3,4,5-tetrachlorobiphenyl     | 3'-OH-PCB 61  | 3'-hydroxy-2,2',3,4,4',5,5'-heptachlorobiphenyl       | 3'-OH-PCB 180     |
| 4'-hydroxy-2,3,4,5-tetrachlorobiphenyl     | 4'-OH-PCB 61  | 3'-hydroxy-2,2',3,4,4',5,6'-heptachlorobiphenyl       | 3'-OH-PCB 182     |
| 2'-hydroxy-2,3,5,6-tetrachlorobiphenyl     | 2'-OH-PCB 65  | 3'-hydroxy-2,2',3,4,4',5',6-heptachlorobiphenyl       | 3'-OH-PCB 183     |
| 3'-hydroxy-2,3,5,6-tetrachlorobiphenyl     | 3'-OH-PCB 65  | 5-hydroxy-2,2',3,4,4',5',6-heptachlorobiphenyl        | 5-OH-PCB 183      |
| 4'-hydroxy-2,3',4,6-tetrachlorobiphenyl    | 4'-OH-PCB 69  | 3'-hydroxy-2,2',3,4,4',6,6'-heptachlorobiphenyl       | 3'-OH-PCB 184     |
| 6'-hydroxy-2,3',4,6-tetrachlorobiphenyl    | 6'-OH-PCB 69  | 4-hydroxy-2,2',3,4',5,5',6-heptachlorobiphenyl        | 4-OH-PCB 187      |
| 4'-hydroxy-2,3',5,5'-tetrachlorobiphenyl   | 4'-OH-PCB 72  | 4-hydroxy-2,3,3',4',5,5',6-heptachlorobiphenyl        | 4-OH-PCB 193      |
| 4'-hydroxy-3,3',4,5'-tetrachlorobiphenyl   | 4'-OH-PCB 79  | 4'-hydroxy-2,2',3,3',4,5,5',6-octachlorobiphenyl      | 4'-OH-PCB 198     |
| 6'-hydroxy-2,2',3,3',5-pentachlorobiphenyl | 6'-OH-PCB 83  | 4'-hydroxy-2,2',3,3',4,5,5',6'-octachlorobiphenyl     | 4'-OH-PCB 199     |
| 4'-hydroxy-2,2',3,4,5-pentachlorobiphenyl  | 4'-OH-PCB 86  | 4'-hydroxy-2,2',3,3',4,5,6,6'-octachlorobiphenyl      | 4'-OH-PCB 200     |
| 4'-hydroxy-2,2',3,5,6-pentachlorobiphenyl  | 4'-OH-PCB 93  | 4'-hydroxy-2,2',3,3',4,5',6,6'-octachlorobiphenyl     | 4'-OH-PCB 201     |
| 4'-hydroxy-2,2',3',4,5-pentachlorobiphenyl | 4'-OH-PCB 97  | 4-hydroxy-2,2',3,3',5,5',6,6'-octachlorobiphenyl      | 4-OH-PCB 202      |
| 4'-hydroxy-2,2',4,5,5'-pentachlorobiphenyl | 4'-OH-PCB 101 | 4,4'-dihydroxy-2,2',3,3',5,5',6,6'-octachlorobiphenyl | 4,4'-diOH-PCB 202 |
| 6'-hydroxy-2,2',4,5,5'-pentachlorobiphenyl | 6'-OH-PCB 101 | 3'-hydroxy-2,2',3,4,4',5,5',6-octachlorobiphenyl      | 3'-OH-PCB 203     |
| 6'-hydroxy-2,3,3',4,5-pentachlorobiphenyl  | 6'-OH-PCB 106 | 4'-hydroxy-2,2',3,3',4,5,5',6,6'-nonachlorobiphenyl   | 4'-OH-PCB 208     |
| 4-hydroxy-2,3,3',4',5-pentachlorobiphenyl  | 4-OH-PCB 107  |                                                       |                   |

**Table S3.** Limit of Quantification (LOQ) for each OH-PCB congener in sediment in units of nanograms per sample.

| Congener                      | LOQ     | Congener                                      | LOQ    |
|-------------------------------|---------|-----------------------------------------------|--------|
| 4-OH-PCB 1                    | 0.36    | 3-OH-PCB 118                                  | 0.032  |
| 6-OH-PCB 2                    | 0.0026  | 4'-OH-PCB 120                                 | 0.16   |
| 2'-OH-PCB 5                   | 0.63    | 4'-OH-PCB 127                                 | 0.87   |
| 4'-OH-PCB 9 + 4-OH-PCB 14     | 0.26    | 4'-OH-PCB 130                                 | 0.28   |
| 2'-OH-PCB 12                  | 0.00094 | 4-OH-PCB 134                                  | 0.039  |
| 4'-OH-PCB 18                  | 0.2     | 3'-OH-PCB 138                                 | 0.068  |
| 4'-OH-PCB 26                  | 0.047   | 5-OH-PCB 138                                  | 0.029  |
| 6'-OH-PCB 26                  | 0.00062 | 4-OH-PCB 146                                  | 0.35   |
| 2'-OH-PCB 30                  | 0.00034 | 3,3'-diOH-PCB 155                             | 0.0050 |
| 3'-OH-PCB 30                  | 0.026   | 4-OH-PCB 162                                  | 0.17   |
| 4'-OH-PCB 30                  | 0.056   | 4-OH-PCB 163                                  | 0.036  |
| 3-OH-PCB 54                   | 0.0051  | 4'-OH-PCB 172                                 | 0.011  |
| 2'-OH-PCB 61                  | 0.0046  | 4-OH-PCB 177                                  | 0.0038 |
| 3'-OH-PCB 61                  | 0.15    | 4-OH-PCB 178                                  | 0.0087 |
| 2'-OH-PCB 65 + 6'-OH-PCB 69   | 0.00012 | 3'-OH-PCB 180                                 | 0.014  |
| 3'-OH-PCB 65                  | 0.33    | 3'-OH-PCB 182                                 | 0.023  |
| 4'-OH-PCB 69                  | 0.029   | 3'-OH-PCB 183                                 | 0.0032 |
| 4'-OH-PCB 72                  | 0.030   | 5-OH-PCB 183 + 4-OH-PCB 187                   | 0.0055 |
| 4'-OH-PCB 79                  | 0.028   | 3'-OH-PCB 184                                 | 0.012  |
| 6'-OH-PCB 83                  | 0.00034 | 4-OH-PCB 193                                  | 0.0021 |
| 4'-OH-PCB 86                  | 0.046   | 4'-OH-PCB 198 + 4'-OH-PCB 200 + 3'-OH-PCB 203 | 0.0032 |
| 4'-OH-PCB 93                  | 0.20    | 4'-OH-PCB 199                                 | 0.0011 |
| 4'-OH-PCB 97                  | 0.016   | 4'-OH-PCB 201                                 | 0.0022 |
| 4'-OH-PCB 101                 | 0.011   | 4-OH-PCB 202                                  | 0.0013 |
| 6'-OH-PCB 101                 | 0.00064 | 4,4'-diOH-PCB 202                             | 0.0049 |
| 6'-OH-PCB 106 + 2'-OH-PCB 114 | 0.0017  | 4'-OH-PCB 208                                 | 0.0037 |

**Table S4.** Frequency of detection (Det), minimum (Min), maximum (Max), median (Med), average (Ave), and standard deviation (Stdev) of the individual and sum OH-PCBs detected in sediment (n = 20) from Indiana Harbor and Ship Canal, East Chicago, IN. OH-PCBs are reported as nanograms per gram dry weight. Frequency of detection is reported as percent.

| Congener                      | Det | Min  | Max   | Med  | Ave  | Stdev |
|-------------------------------|-----|------|-------|------|------|-------|
| 4-OH-PCB 1                    | 0   | <LOQ | <LOQ  | <LOQ | <LOQ | 0.00  |
| 6-OH-PCB 2                    | 100 | 0.03 | 3.79  | 0.85 | 1.14 | 1.04  |
| 2'-OH-PCB 5                   | 10  | <LOQ | 1.32  | <LOQ | 0.10 | 0.33  |
| 4'-OH-PCB 9 + 4-OH-PCB 14     | 15  | <LOQ | 5.55  | <LOQ | 0.31 | 1.24  |
| 2'-OH-PCB 12                  | 15  | <LOQ | 0.17  | <LOQ | 0.01 | 0.04  |
| 4'-OH-PCB 18                  | 85  | <LOQ | 3.09  | 0.66 | 0.80 | 0.75  |
| 4'-OH-PCB 26                  | 55  | <LOQ | 0.84  | 0.05 | 0.16 | 0.24  |
| 6'-OH-PCB 26                  | 100 | 0.01 | 0.78  | 0.19 | 0.26 | 0.22  |
| 2'-OH-PCB 30                  | 5   | <LOQ | <LOQ  | <LOQ | <LOQ | 0.00  |
| 3'-OH-PCB 30                  | 10  | <LOQ | 0.05  | <LOQ | <LOQ | 0.01  |
| 4'-OH-PCB 30                  | 5   | <LOQ | 0.23  | <LOQ | 0.01 | 0.05  |
| 3-OH-PCB 54                   | 35  | <LOQ | 0.05  | <LOQ | 0.01 | 0.01  |
| 2'-OH-PCB 61                  | 50  | <LOQ | 0.79  | 0.01 | 0.13 | 0.23  |
| 3'-OH-PCB 61                  | 0   | <LOQ | <LOQ  | <LOQ | <LOQ | 0.00  |
| 2'-OH-PCB 65 + 6'-OH-PCB 69   | 15  | <LOQ | 0.01  | <LOQ | <LOQ | 0.00  |
| 3'-OH-PCB 65                  | 95  | <LOQ | 10.24 | 3.08 | 3.79 | 2.91  |
| 4'-OH-PCB 69                  | 85  | <LOQ | 0.86  | 0.12 | 0.21 | 0.23  |
| 4'-OH-PCB 72                  | 30  | <LOQ | 0.21  | <LOQ | 0.03 | 0.06  |
| 4'-OH-PCB 79                  | 30  | <LOQ | 0.03  | <LOQ | 0.01 | 0.01  |
| 6'-OH-PCB 83                  | 20  | <LOQ | 0.05  | <LOQ | <LOQ | 0.01  |
| 4'-OH-PCB 86                  | 30  | <LOQ | 0.29  | <LOQ | 0.04 | 0.08  |
| 4'-OH-PCB 93                  | 50  | <LOQ | 0.44  | 0.06 | 0.16 | 0.18  |
| 4'-OH-PCB 97                  | 90  | <LOQ | 0.30  | 0.12 | 0.13 | 0.11  |
| 4'-OH-PCB 101                 | 95  | <LOQ | 0.31  | 0.10 | 0.12 | 0.09  |
| 6'-OH-PCB 101                 | 40  | <LOQ | 0.02  | <LOQ | <LOQ | 0.01  |
| 6'-OH-PCB 106 + 2'-OH-PCB 114 | 0   | <LOQ | <LOQ  | <LOQ | <LOQ | 0.00  |
| 3-OH-PCB 118                  | 10  | <LOQ | 0.18  | <LOQ | 0.01 | 0.05  |
| 4'-OH-PCB 120                 | 35  | <LOQ | 0.14  | <LOQ | 0.04 | 0.05  |
| 4'-OH-PCB 127                 | 25  | <LOQ | 1.07  | <LOQ | 0.17 | 0.34  |
| 4'-OH-PCB 130                 | 0   | <LOQ | <LOQ  | <LOQ | <LOQ | 0.00  |
| 4-OH-PCB 134                  | 0   | <LOQ | <LOQ  | <LOQ | <LOQ | 0.00  |
| 3'-OH-PCB 138                 | 10  | <LOQ | 0.06  | <LOQ | 0.01 | 0.02  |
| 5-OH-PCB 138                  | 50  | <LOQ | 0.04  | 0.01 | 0.01 | 0.01  |
| 4-OH-PCB 146                  | 0   | <LOQ | <LOQ  | <LOQ | <LOQ | 0.00  |
| 3,3'-diOH-PCB 155             | 0   | <LOQ | <LOQ  | <LOQ | <LOQ | 0.00  |
| 4-OH-PCB 162                  | 10  | <LOQ | 0.19  | <LOQ | 0.01 | 0.05  |
| 4-OH-PCB 163                  | 0   | <LOQ | <LOQ  | <LOQ | <LOQ | 0.00  |
| 4'-OH-PCB 172                 | 0   | <LOQ | <LOQ  | <LOQ | <LOQ | 0.00  |
| 4-OH-PCB 177                  | 5   | <LOQ | 0.01  | <LOQ | <LOQ | 0.00  |
| 4-OH-PCB 178                  | 10  | <LOQ | 0.01  | <LOQ | <LOQ | 0.00  |



**Table S4 (continued)**

| Abbreviation                                  | Det | Min  | Max  | Med  | Ave  | Stdev |
|-----------------------------------------------|-----|------|------|------|------|-------|
| 3'-OH-PCB 180                                 | 0   | <LOQ | <LOQ | <LOQ | <LOQ | 0.00  |
| 3'-OH-PCB 182                                 | 0   | <LOQ | <LOQ | <LOQ | <LOQ | 0.00  |
| 3'-OH-PCB 183                                 | 0   | <LOQ | <LOQ | <LOQ | <LOQ | 0.00  |
| 5-OH-PCB 183 + 4-OH-PCB 187                   | 10  | <LOQ | 0.03 | <LOQ | <LOQ | 0.01  |
| 3'-OH-PCB 184                                 | 0   | <LOQ | <LOQ | <LOQ | <LOQ | 0.00  |
| 4-OH-PCB 193                                  | 0   | <LOQ | <LOQ | <LOQ | <LOQ | 0.00  |
| 4'-OH-PCB 198 + 4'-OH-PCB 200 + 3'-OH-PCB 203 | 30  | <LOQ | 0.01 | <LOQ | <LOQ | 0.00  |
| 4'-OH-PCB 199                                 | 25  | <LOQ | 0.01 | <LOQ | <LOQ | 0.00  |
| 4'-OH-PCB 201                                 | 0   | <LOQ | <LOQ | <LOQ | <LOQ | 0.00  |
| 4-OH-PCB 202                                  | 0   | <LOQ | <LOQ | <LOQ | <LOQ | 0.00  |
| 4,4'-diOH-PCB 202                             | 0   | <LOQ | <LOQ | <LOQ | <LOQ | 0.00  |
| 4'-OH-PCB 208                                 | 10  | <LOQ | <LOQ | <LOQ | <LOQ | 0.00  |
| $\Sigma$ OH-PCB <sub>58</sub>                 | 100 | 0.19 | 26   | 6.8  | 7.7  | 6.2   |

**Table S5.** Congener distribution as percent of  $\Sigma$ OH-PCB<sub>64</sub> for 5 Aroclors as percent. Values for Aroclors 1221 and 1248 are the average and (standard deviation) of 3 replicates.

| Congener                      | 1016  | 1221          | 1242 | 1248          | 1254  |
|-------------------------------|-------|---------------|------|---------------|-------|
| 4-OH-PCB 1                    | 0.75  | 14 (8.9)      | 0    | 0.18 (0.16)   | 0.026 |
| 4-OH-PCB 2                    | 0     | 0             | 0    | 1.2 (2.0)     | 0     |
| 6-OH-PCB 2                    | 0.32  | 5.6 (3.8)     | 0.69 | 3.0 (0.03)    | 0.017 |
| 4'-OH-PCB 3                   | 0     | 0             | 0    | 0             | 0     |
| 2'-OH-PCB 5                   | 0     | 0             | 0    | 0             | 0     |
| 3'-OH-PCB 9                   | 0     | 0             | 0    | 0             | 0.12  |
| 4'-OH-PCB 9 + 4-OH-PCB 14     | 1.5   | 5.3 (5.6)     | 0    | 0.73 (0.26)   | 0.51  |
| 2'-OH-PCB 12                  | 71    | 0             | 0    | 0             | 0.99  |
| 4'-OH-PCB 18                  | 0     | 2.4 (2.1)     | 4.1  | 1.7 (0.17)    | 0.94  |
| 4'-OH-PCB 26                  | 3.4   | 8.9 (7.2)     | 6.1  | 6.4 (0.27)    | 8.8   |
| 6'-OH-PCB 26                  | 0     | 7.5 (4.4)     | 5.9  | 1.2 (0.12)    | 3.7   |
| 2'-OH-PCB 30                  | 0     | 0             | 0    | 0             | 0     |
| 3'-OH-PCB 30                  | 0     | 0             | 0    | 0             | 0     |
| 4'-OH-PCB 30                  | 10    | 0.42 (0.72)   | 0    | 0.17 (0.086)  | 0     |
| 3-OH-PCB 54                   | 2.8   | 0             | 0    | 0             | 0.15  |
| 2'-OH-PCB 61                  | 0     | 0             | 0    | 0             | 0     |
| 3'-OH-PCB 61                  | 0     | 0             | 0    | 0             | 0     |
| 4'-OH-PCB 61                  | 0     | 0             | 0    | 1.3 (0.24)    | 0.82  |
| 2'-OH-PCB 65 + 6'-OH-PCB 69   | 0.22  | 0             | 0    | 1.1 (0.077)   | 1.5   |
| 3'-OH-PCB 65                  | 7.6   | 48 (8.8)      | 69   | 50 (1.6)      | 42    |
| 4'-OH-PCB 69                  | 0.82  | 2.0 (1.1)     | 6.5  | 4.7 (0.41)    | 2.9   |
| 4'-OH-PCB 72                  | 0.98  | 0             | 0    | 0.13 (0.23)   | 0     |
| 4'-OH-PCB 79                  | 0     | 0             | 1.1  | 0             | 0     |
| 6'-OH-PCB 83                  | 0.003 | 0             | 0    | 0.1 (0.038)   | 1.7   |
| 4'-OH-PCB 86                  | 0     | 0             | 0    | 0.89 (0.77)   | 0.85  |
| 4'-OH-PCB 93                  | 0.23  | 0             | 0    | 2.2 (0.85)    | 26    |
| 4'-OH-PCB 97                  | 0.071 | 0             | 0    | 0.49 (0.075)  | 4.2   |
| 4'-OH-PCB 101                 | 0.036 | 1.1 (0.1822)  | 0    | 0.66 (0.057)  | 0.81  |
| 6'-OH-PCB 101                 | 0     | 0             | 0    | 1.1 (0.23)    | 0.25  |
| 6'-OH-PCB 106 + 2'-OH-PCB 114 | 0     | 0             | 0    | 0             | 0     |
| 4-OH-PCB 107                  | 0.045 | 0.18 (0.32)   | 0.82 | 0.39 (0.089)  | 0.38  |
| 4'-OH-PCB 108                 | 0     | 0             | 0    | 17 (0.67)     | 0     |
| 3-OH-PCB 118                  | 0     | 0             | 0    | 0.52 (0.22)   | 0.21  |
| 4'-OH-PCB 120                 | 0.092 | 2.6 (2.9)     | 5.3  | 2.0 (0.21)    | 2     |
| 4'-OH-PCB 127                 | 0.13  | 0             | 0    | 2.6 (0.17)    | 0.59  |
| 4'-OH-PCB 130                 | 0.015 | 0             | 0    | 0.067 (0.026) | 0.14  |
| 4-OH-PCB 134                  | 0.003 | 0             | 0    | 0             | 0     |
| 3'-OH-PCB 138                 | 0     | 0             | 0    | 0.14 (0.033)  | 0.065 |
| 5-OH-PCB 138                  | 0     | 0.54 (0.4650) | 0    | 0             | 0.18  |
| 4-OH-PCB 146                  | 0.047 | 1.3 (0.279)   | 0    | 0.17 (0.05)   | 0.43  |
| 3,3'-diOH-PCB 155             | 0     | 0             | 0    | 0             | 0     |
| 4-OH-PCB 162                  | 0     | 0             | 0    | 0             | 0     |

**Table S5 (continued)**

| Congener                                      | 1016   | 1221 | 1242 | 1248 | 1254   |
|-----------------------------------------------|--------|------|------|------|--------|
| 4-OH-PCB 163                                  | 0.0043 | 0    | 0    | 0    | 0      |
| 4'-OH-PCB 172                                 | 0      | 0    | 0    | 0    | 0.009  |
| 4-OH-PCB 177                                  | 0      | 0    | 0    | 0    | 0.012  |
| 4-OH-PCB 178                                  | 0      | 0    | 0    | 0    | 0.0028 |
| 3'-OH-PCB 180                                 | 0      | 0    | 0    | 0    | 0.0049 |
| 3'-OH-PCB 182                                 | 0      | 0    | 0    | 0    | 0.097  |
| 3'-OH-PCB 183                                 | 0      | 0    | 0    | 0    | 0.013  |
| 5-OH-PCB 183 + 4-OH-PCB 187                   | 0      | 0    | 0    | 0    | 0.047  |
| 3'-OH-PCB 184                                 | 0      | 0    | 0    | 0    | 0.023  |
| 4-OH-PCB 193                                  | 0      | 0    | 0    | 0    | 0      |
| 4'-OH-PCB 198 + 4'-OH-PCB 200 + 3'-OH-PCB 203 | 0      | 0    | 0    | 0    | 0      |
| 4'-OH-PCB 199                                 | 0      | 0    | 0    | 0    | 0      |
| 4'-OH-PCB 201                                 | 0      | 0    | 0    | 0    | 0      |
| 4-OH-PCB 202                                  | 0      | 0    | 0    | 0    | 0      |
| 4,4'-diOH-PCB 202                             | 0      | 0    | 0    | 0    | 0      |
| 4'-OH-PCB 208                                 | 0      | 0    | 0    | 0    | 0      |
